# Supplementary material for: New acetylacetone-polymer modified nanoparticles as magnetically separable complexing agents
Source: Royal Society of Chemistry journal article supplement (doi:10.1039/c5ra20137c), 2015-01-01

## New acetylacetonate-polymer modified nanoparticles as magnetically separable complexing agents.

I. Misztalewska, A. Z. Wilczewska, O. Wojtasik, K. H. Markiewicz, P. Kuchlewski and A. M. Majcher

### Supporting information

#### 4-vinylbenzyl iodide

Sodium iodide (534 mg, 3.56 mmol) was placed in Schlenk flask under argon atmosphere. Subsequently 4ml of butan-2-one and 0,1 ml (0.71 mmol) of 4-vinylbenzylchloride were added. The reaction mixture was stirred at inert atmosphere for 4 days in room temperature with absence of sunlight. After completion of the reaction solvent was evaporated and then diethyl ether was added (15 ml). Afterwards mixture was washed 3 times with water. Organic layer were then dried under anhydrous Na<sub>2</sub>SO<sub>4</sub> and filtrated. Filtrate was evaporated and the product as yellow oil was obtained (yield 85%).

<sup>1</sup>HNMR (400MHz, CD<sub>3</sub>Cl, δ, ppm): 7.35 (s, 4H), 6.70 (dd, 1H, J<sub>1</sub>=17.57Hz, J<sub>2</sub>=10.85Hz), 5.77 (d, 1H, J=17.60Hz), 5.27 (d, 1H, J=10.92Hz), 4.48 (s, 2H); <sup>13</sup>CNMR (100MHz, CD<sub>3</sub>Cl, δ, ppm): 138.8, 137.2, 136.3, 129.0, 126.7, 114.5, 5.86; FT-IR (ATR, ν) cm<sup>-1</sup>: 3083, 3020, 2921, 2848, 1682, 1508, 1406, 1153, 1081, 987, 840, 720, 580.

#### IR Spectra:

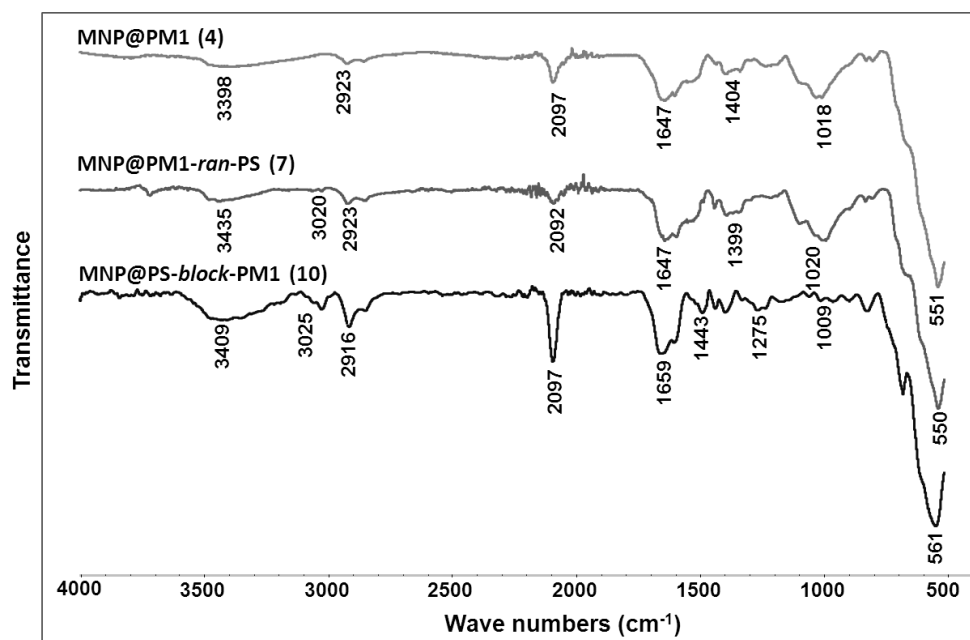

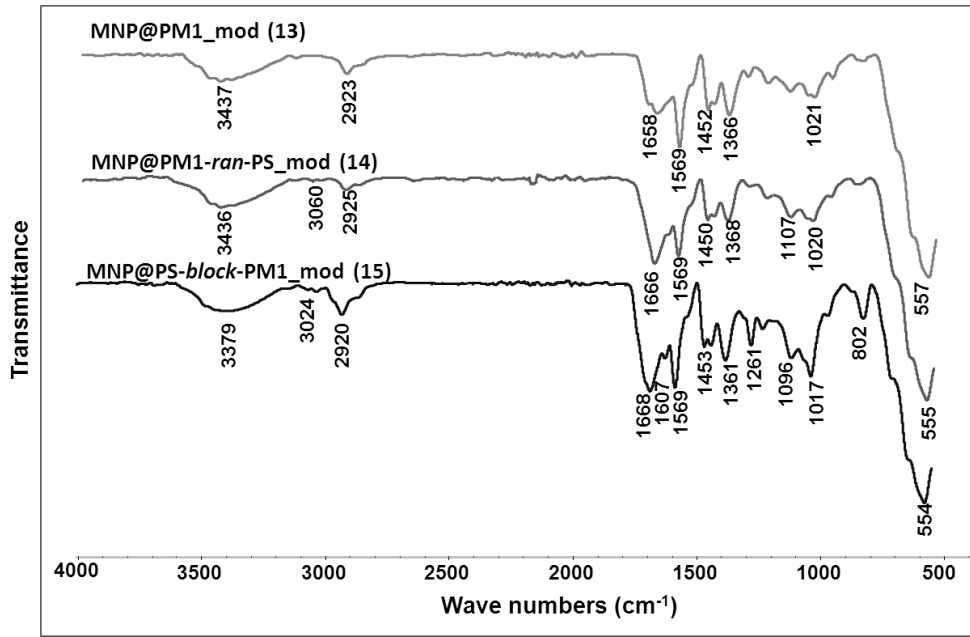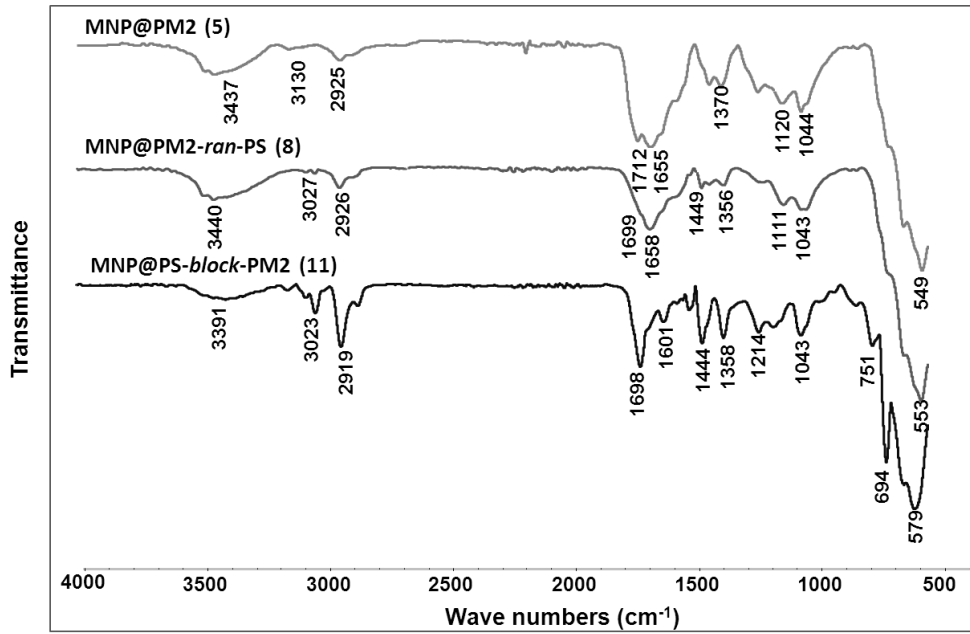

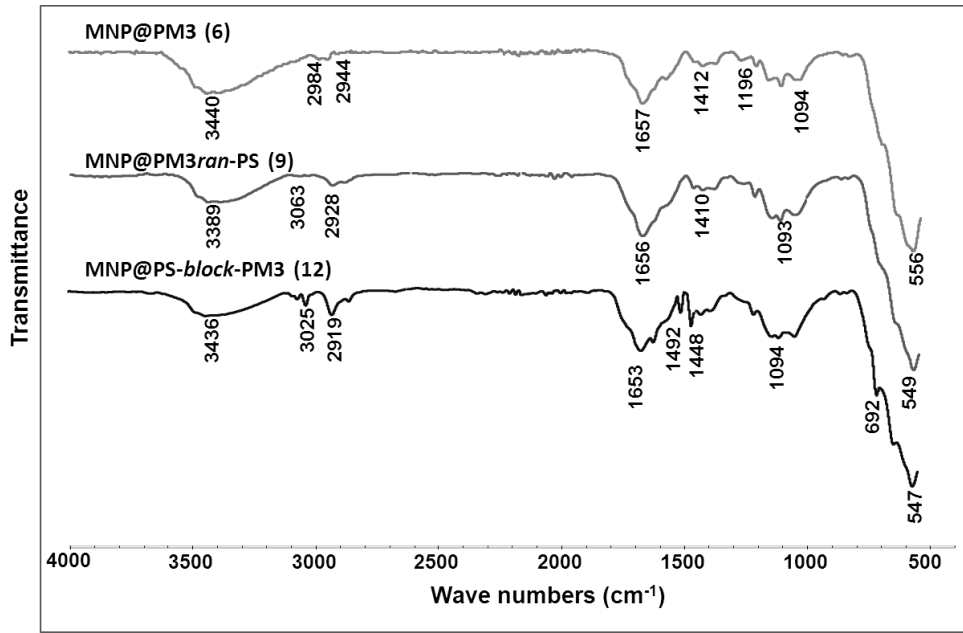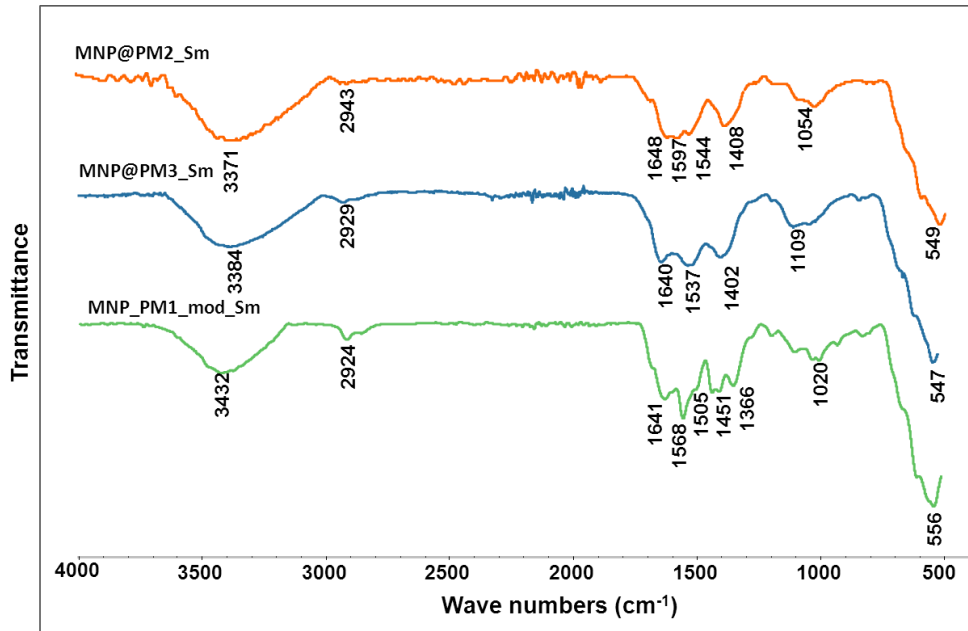

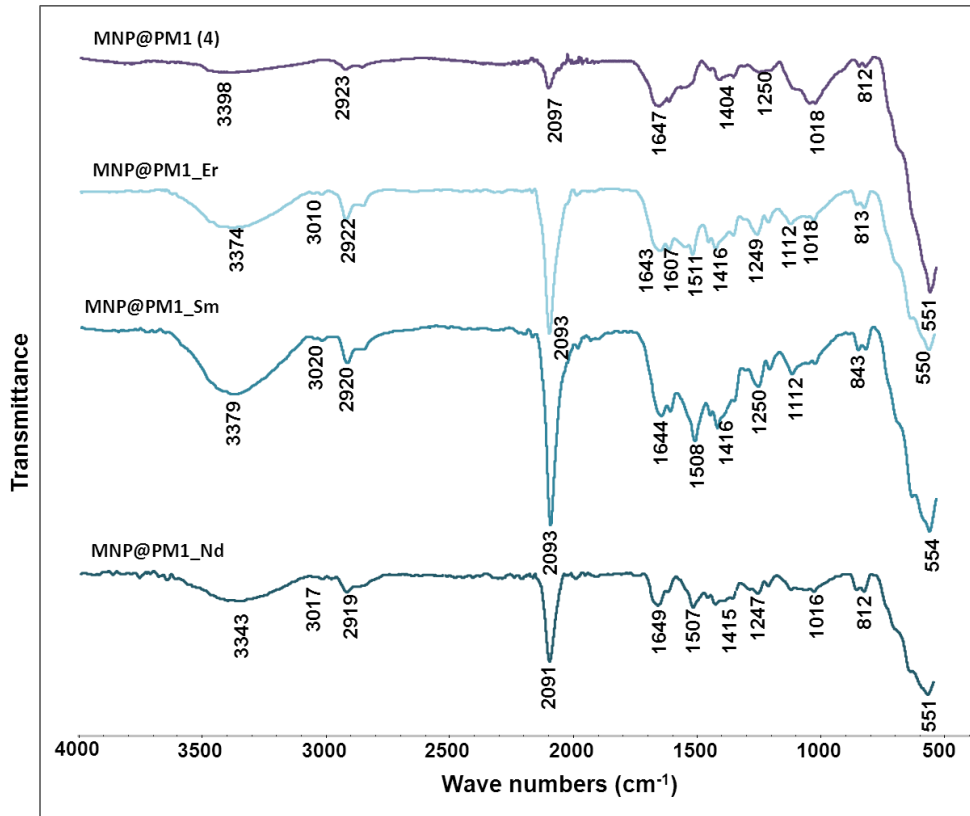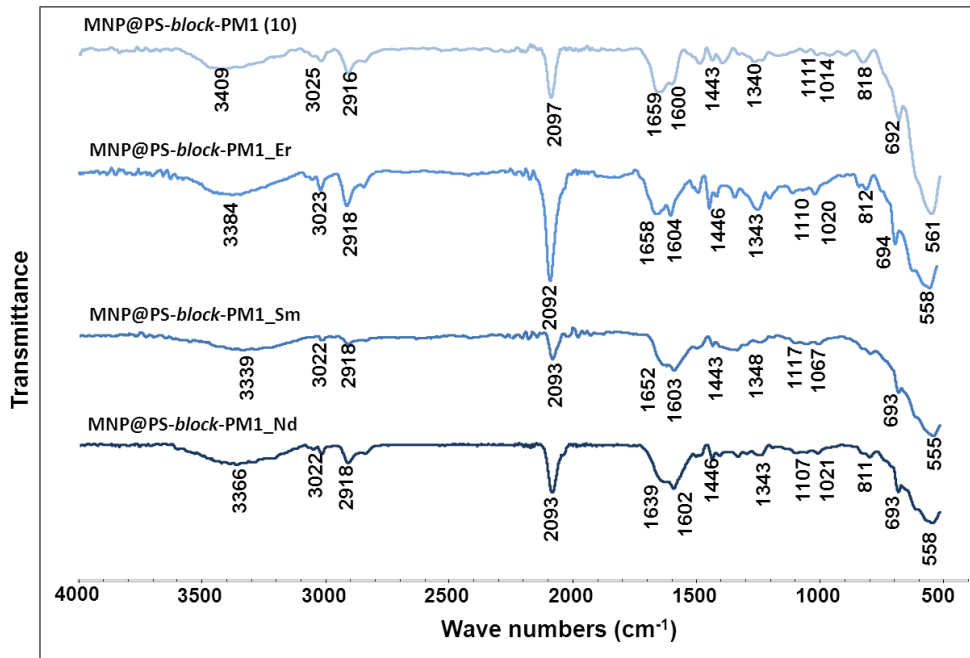

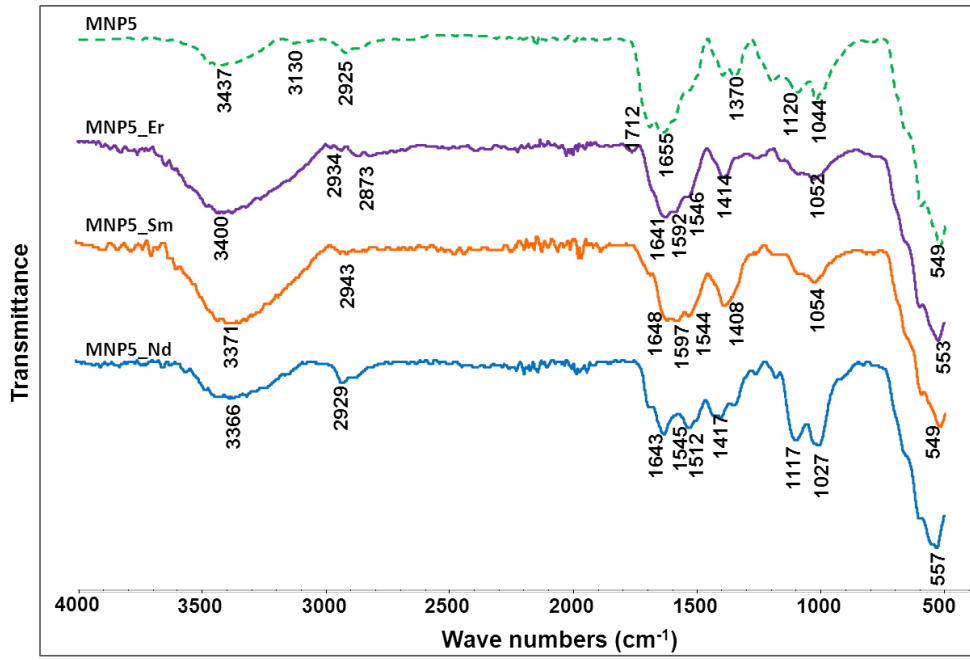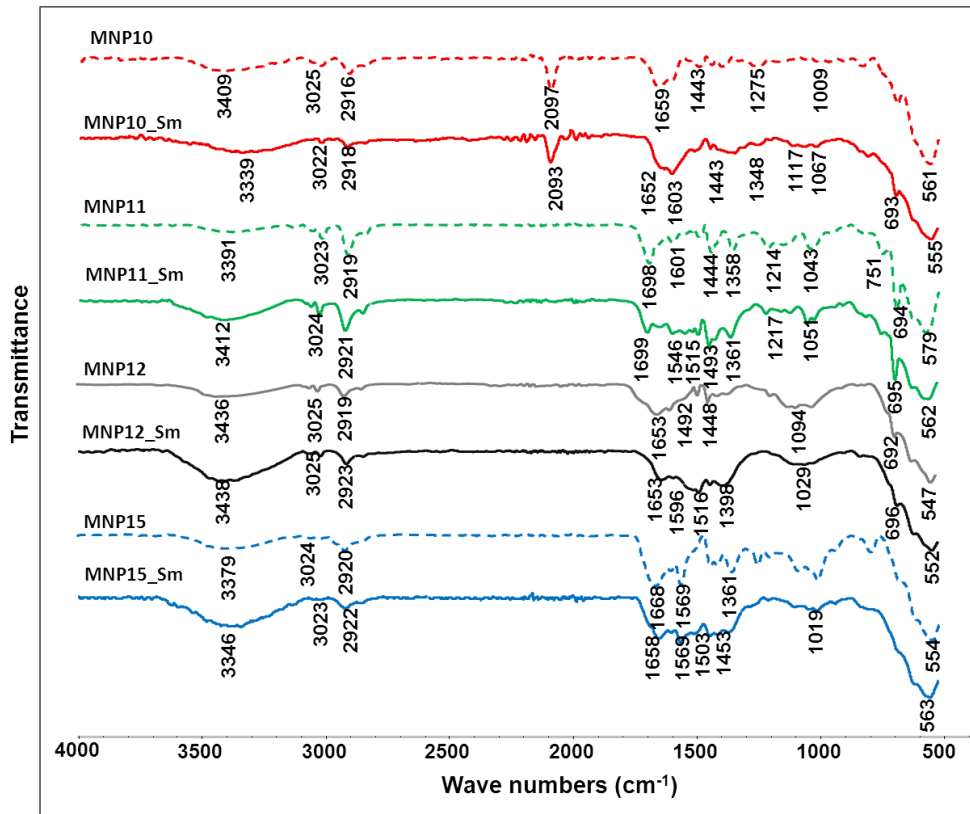

UV spectra (normalized to 1)

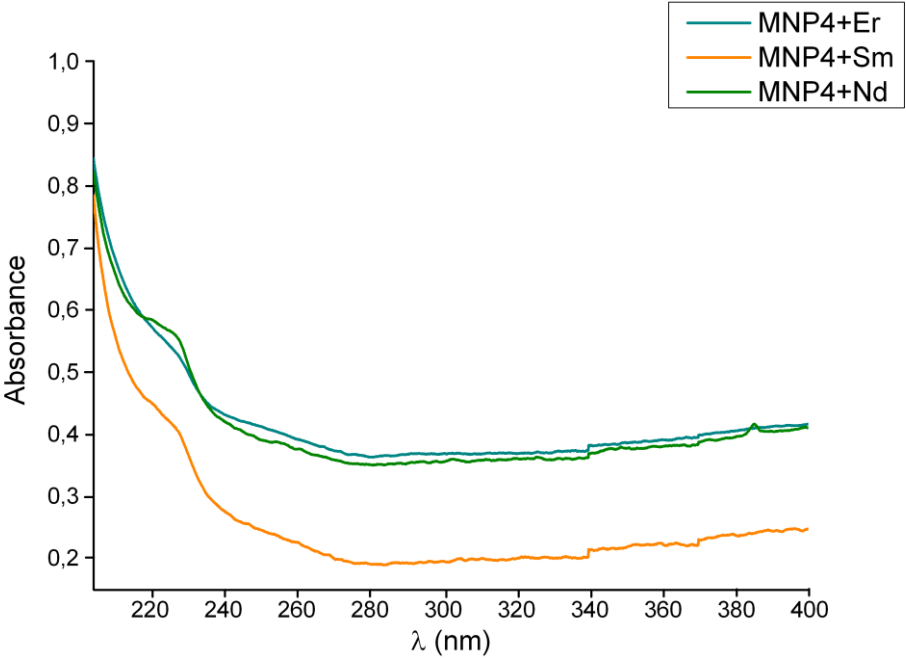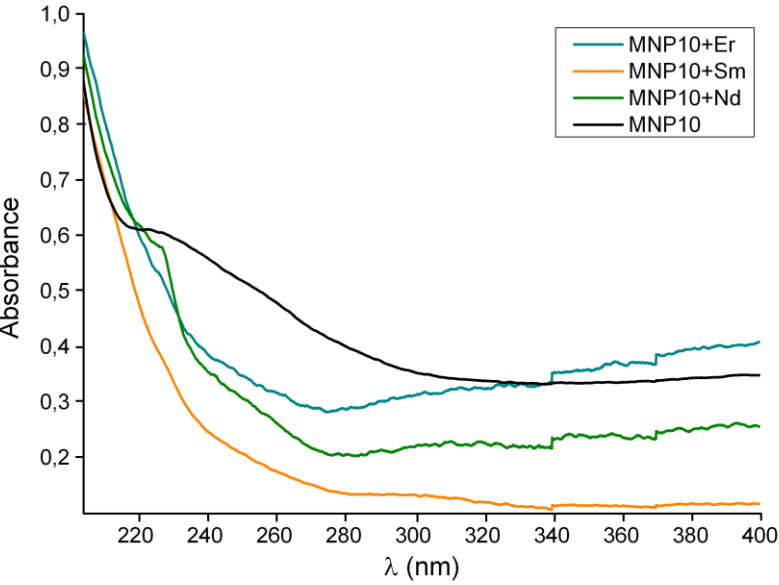

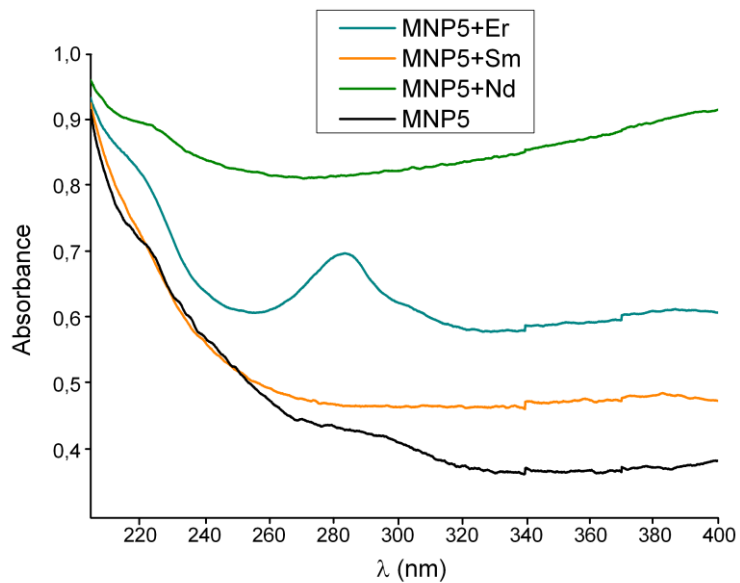

**Luminescence spectra:**

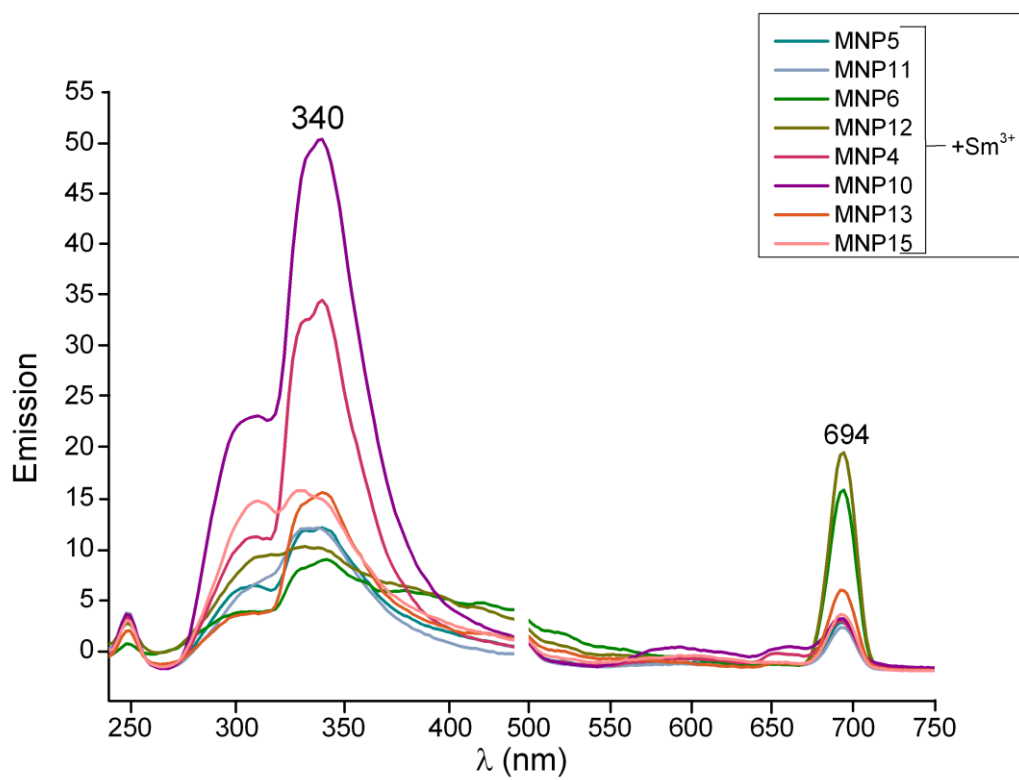

Normalised to 1

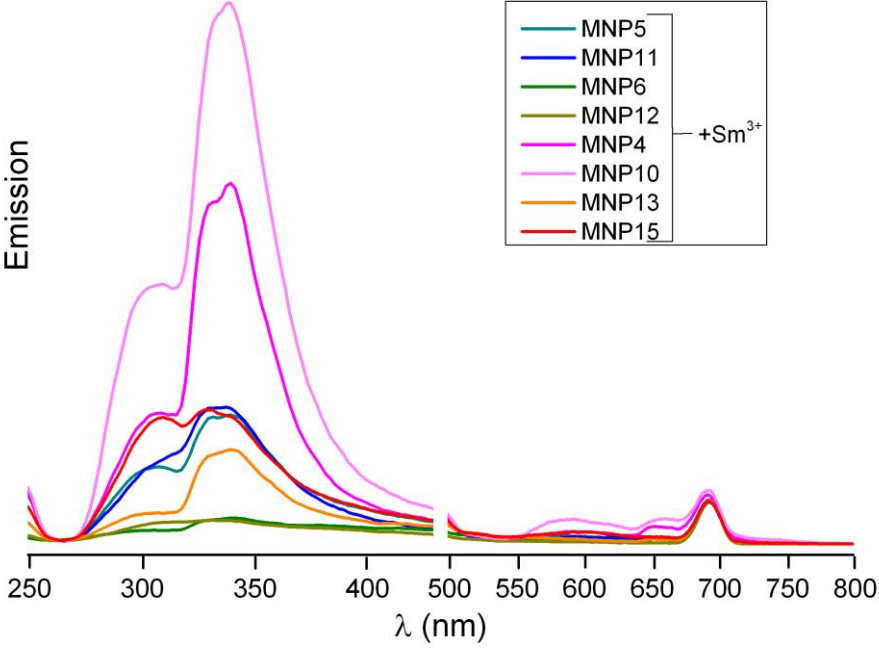

SEM/EDX:

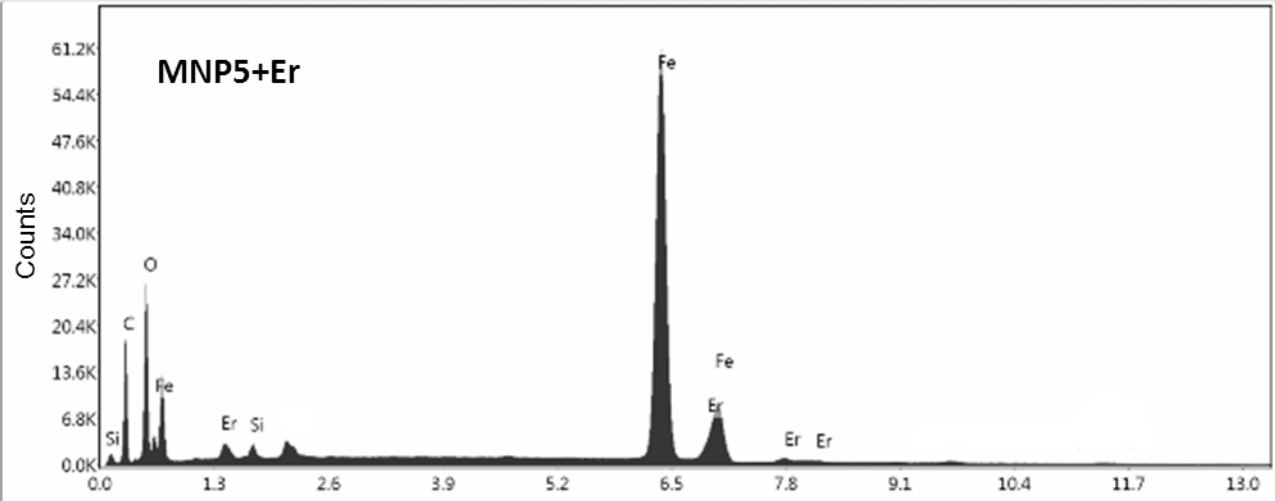



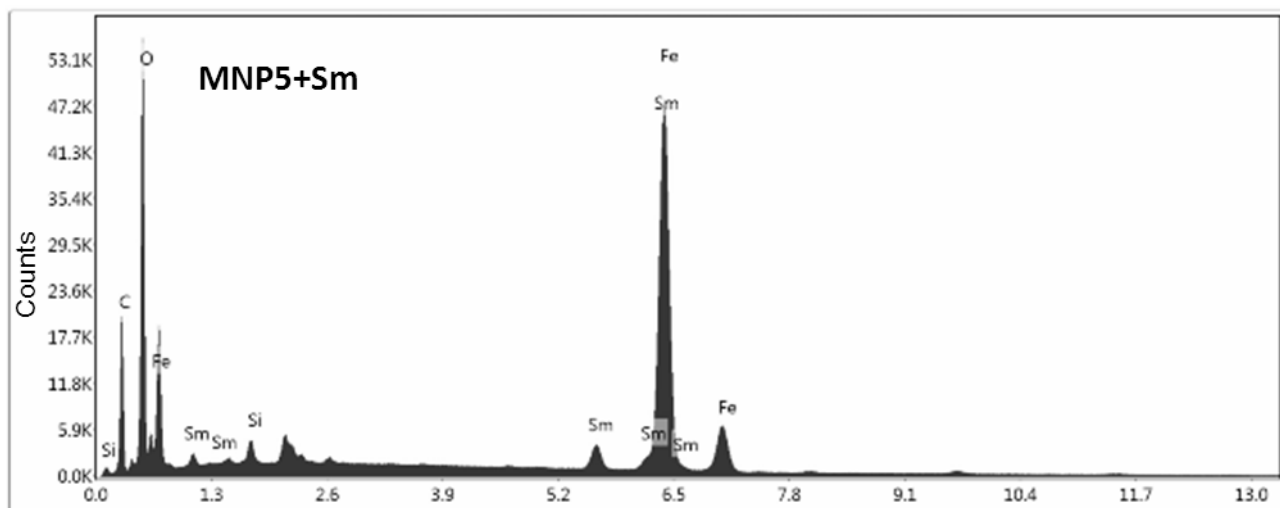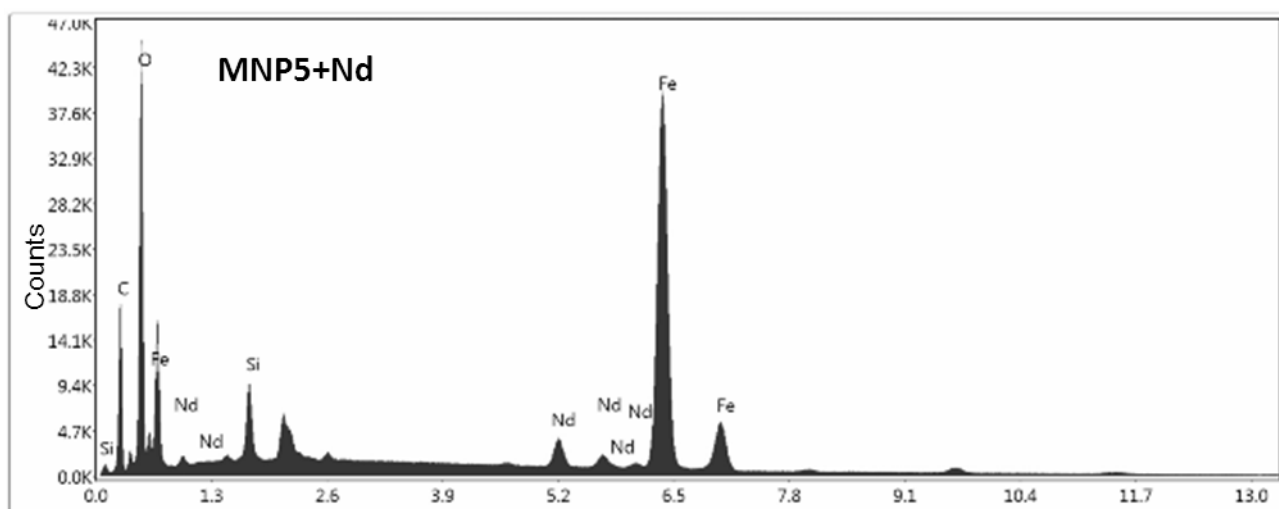

**<sup>1</sup>H and <sup>13</sup>C NMR**  
Monomer 1

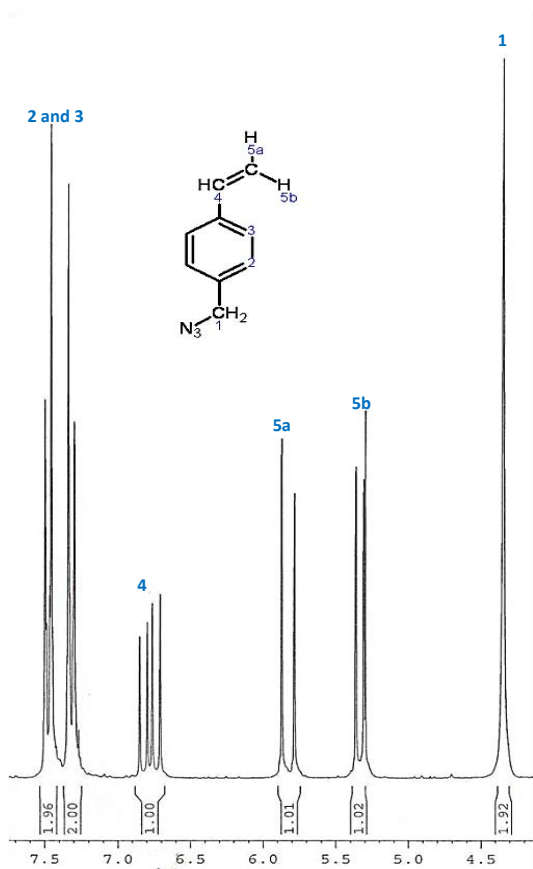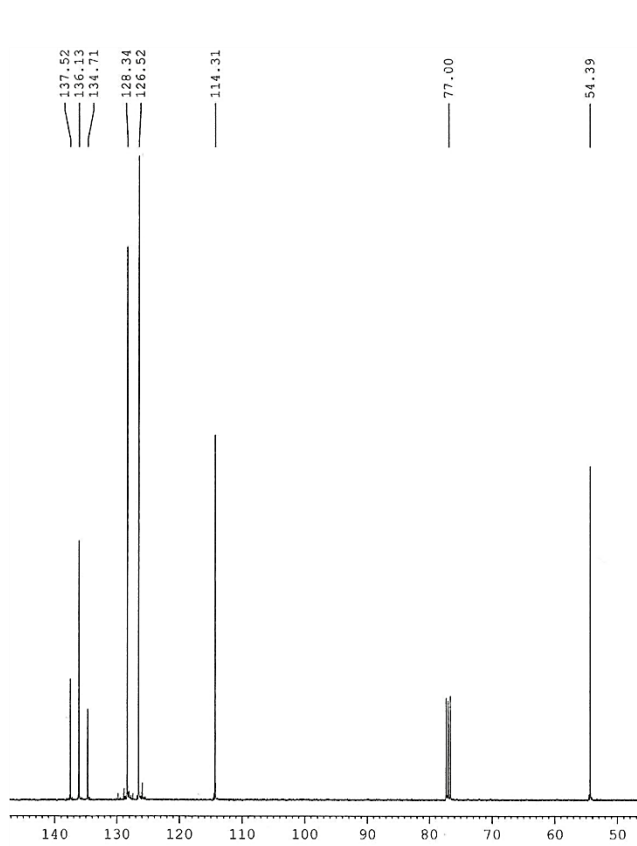

**Compound 2a**

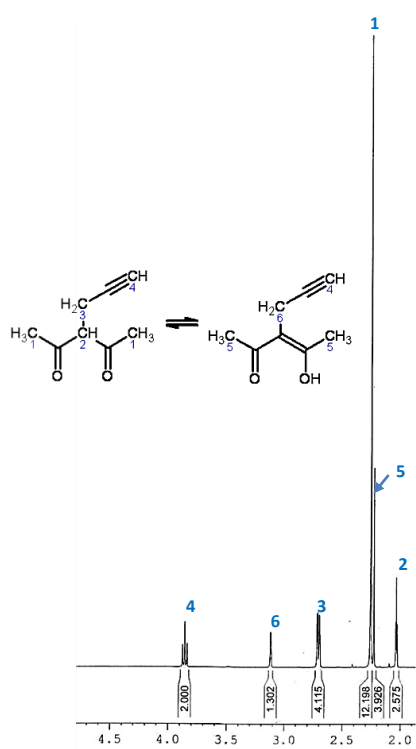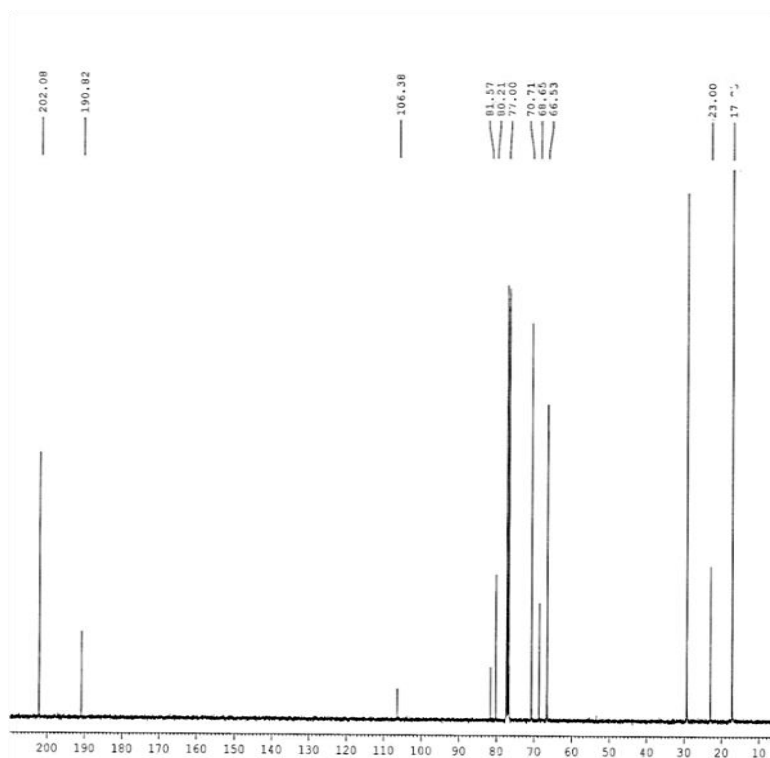

# 4-vinylbenzyl iodide

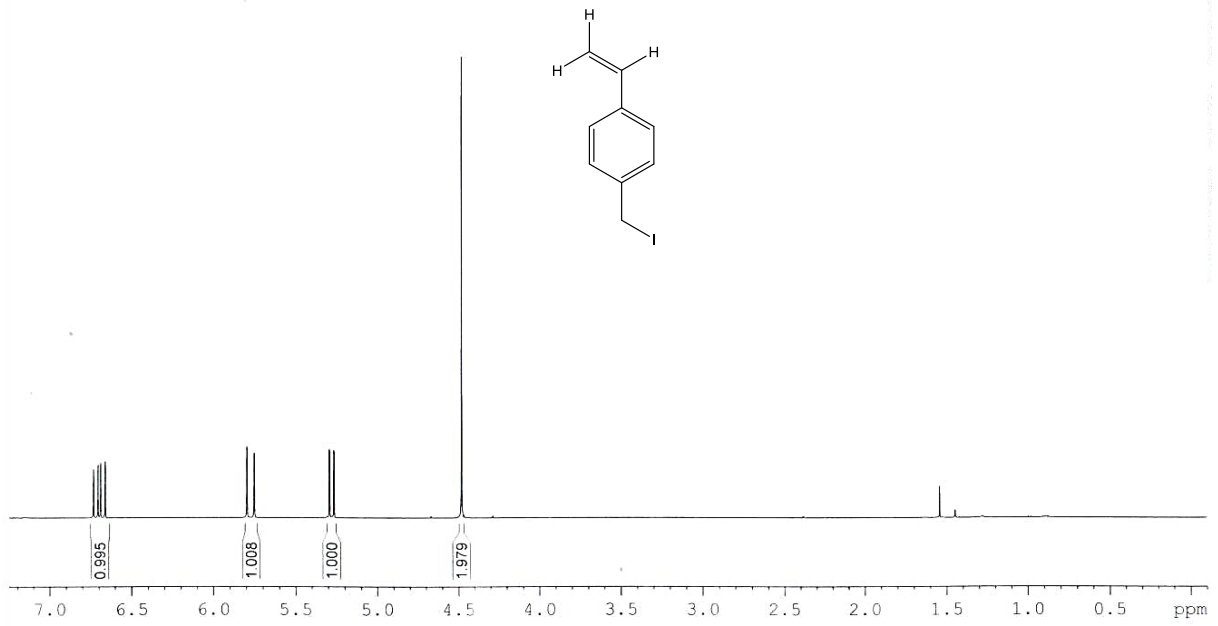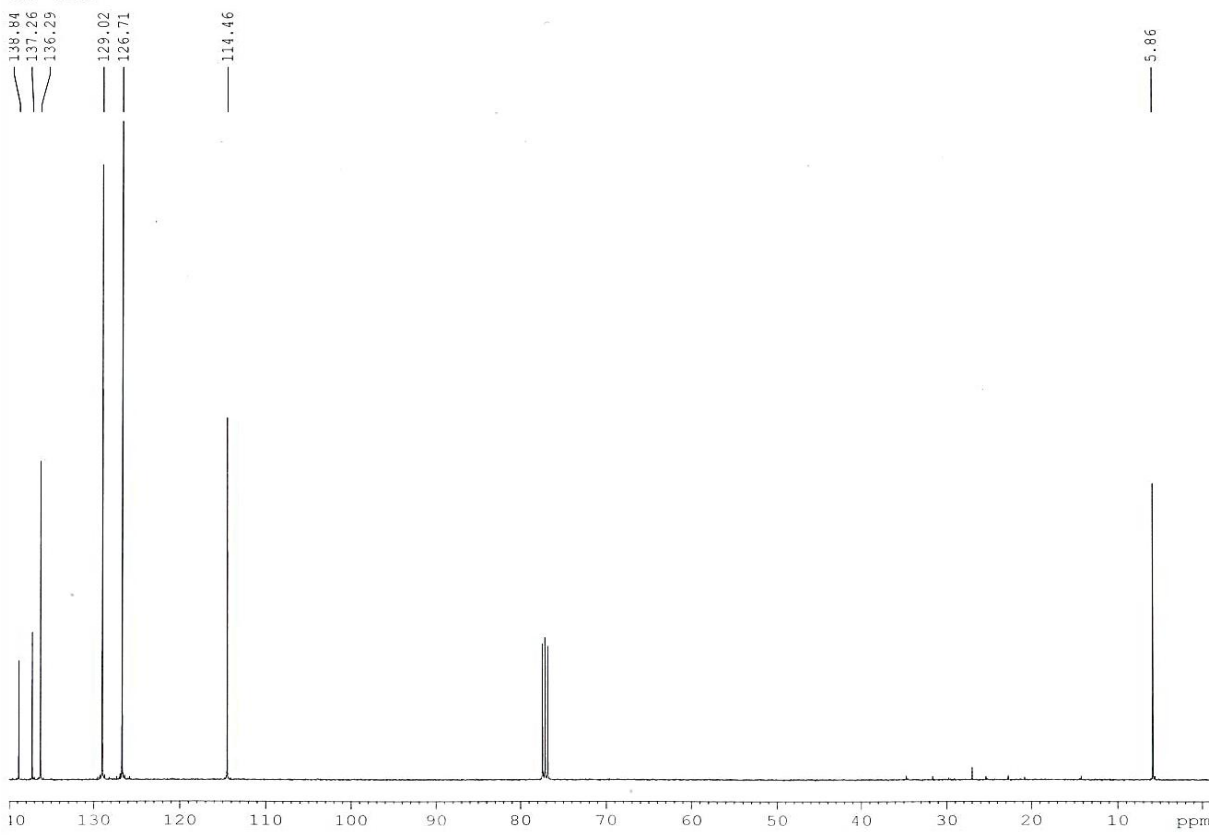

# Monomer 2

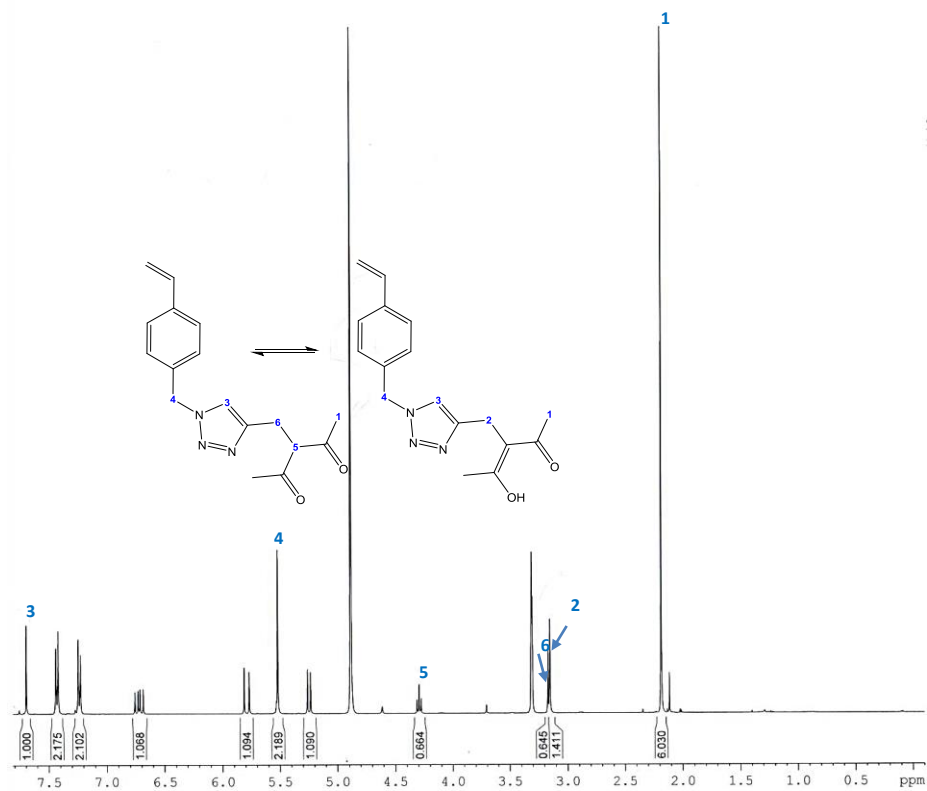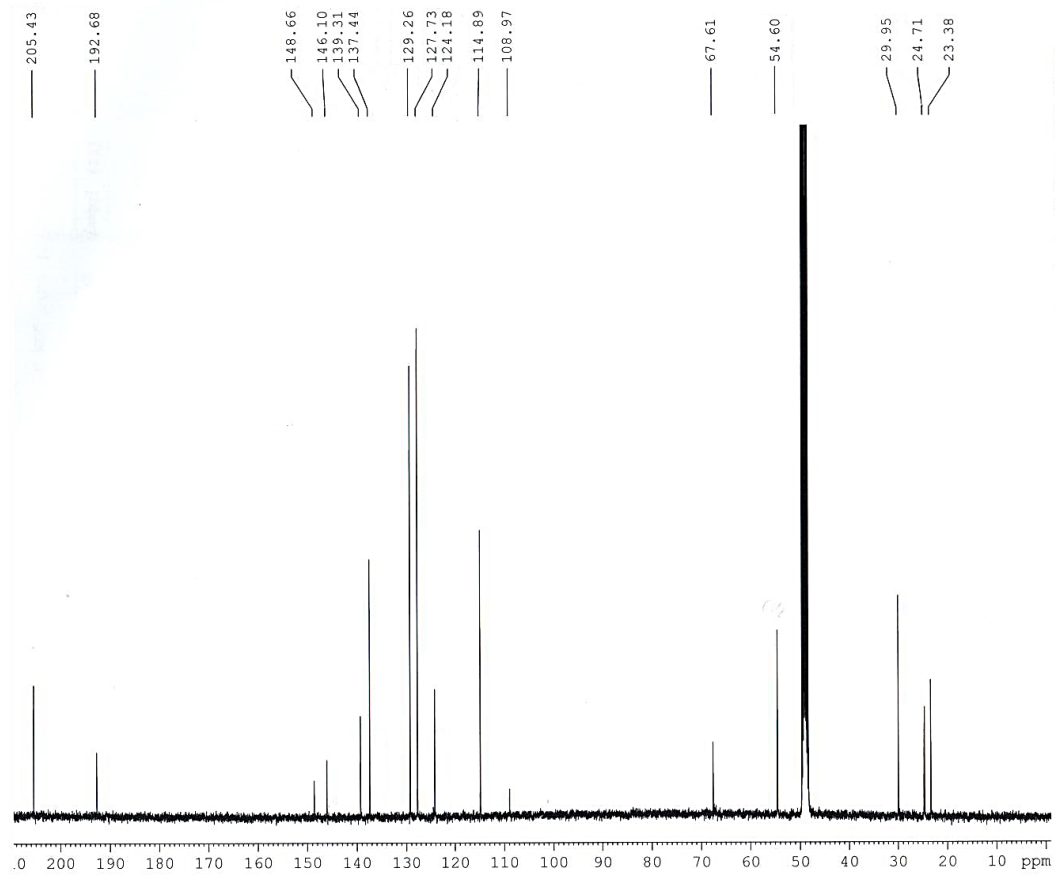

Monomer 3

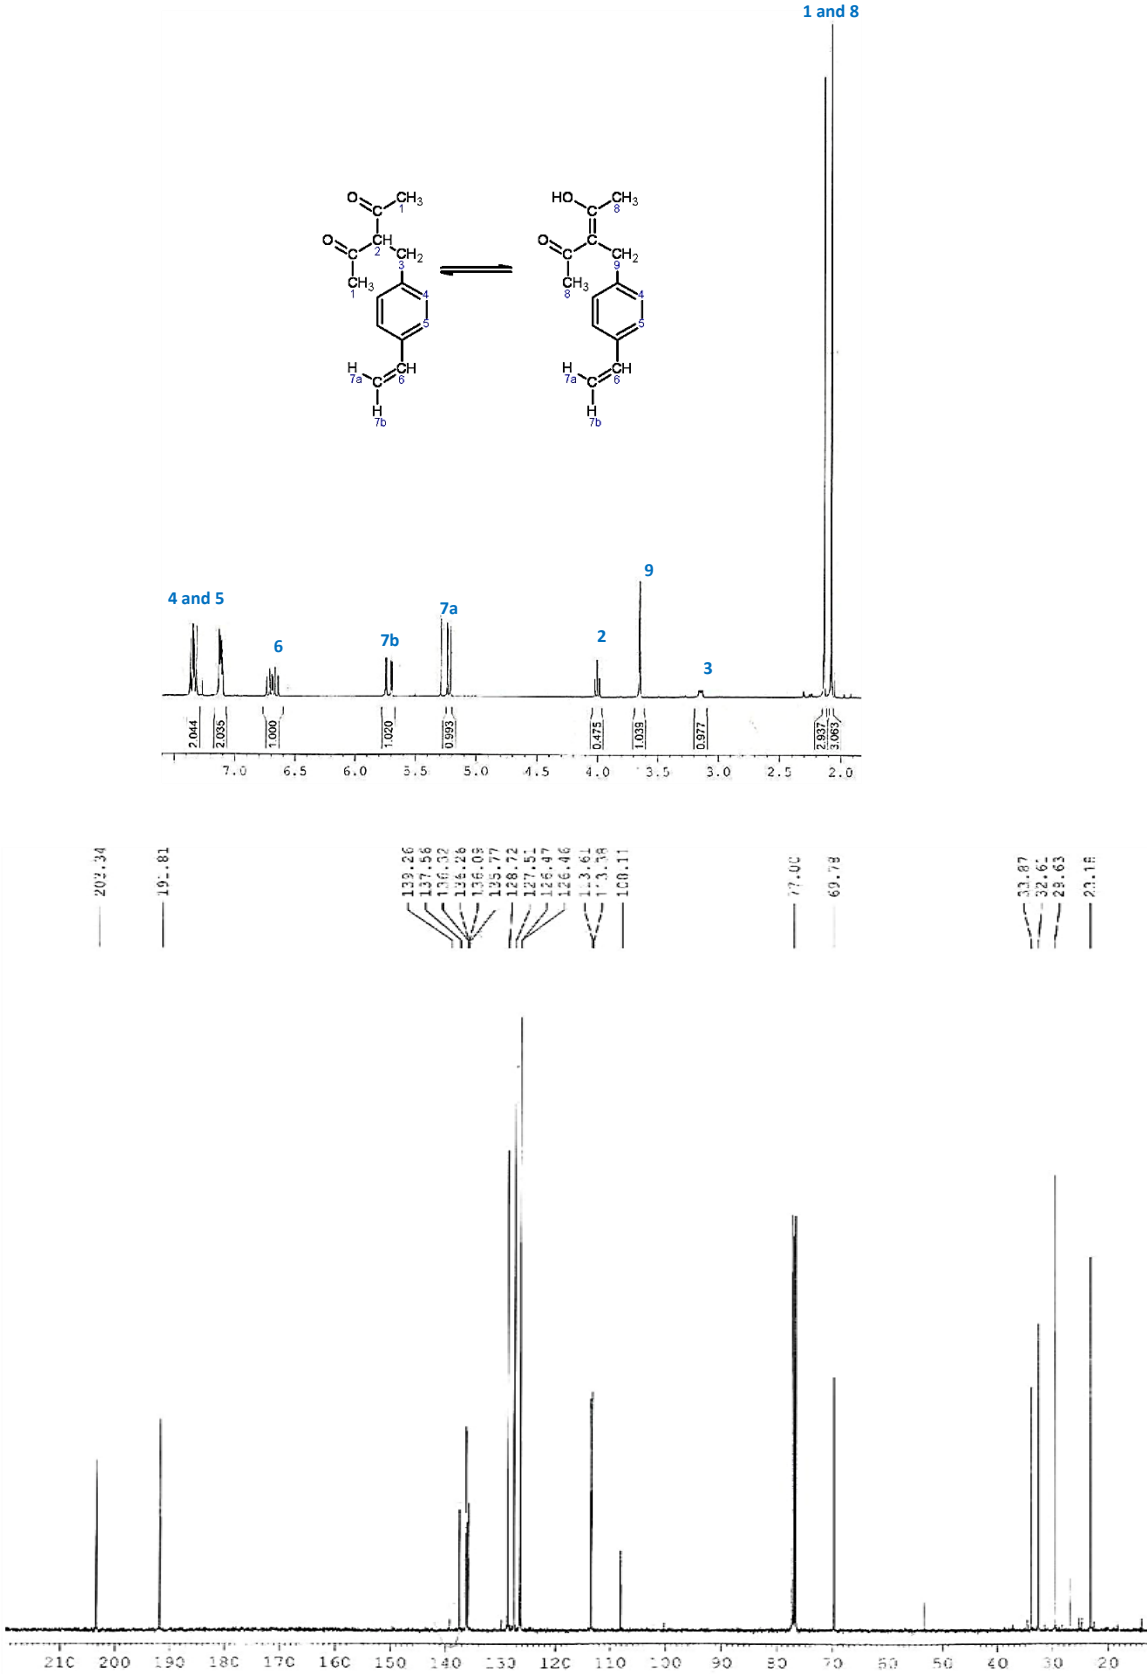

## TEM and SEM photographs

MNP 5

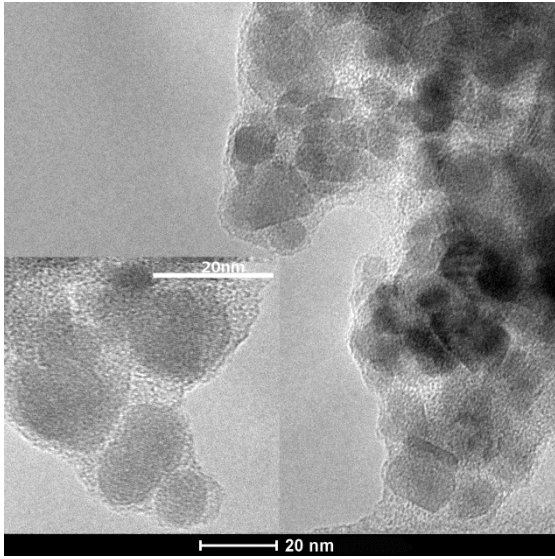

MNP 11

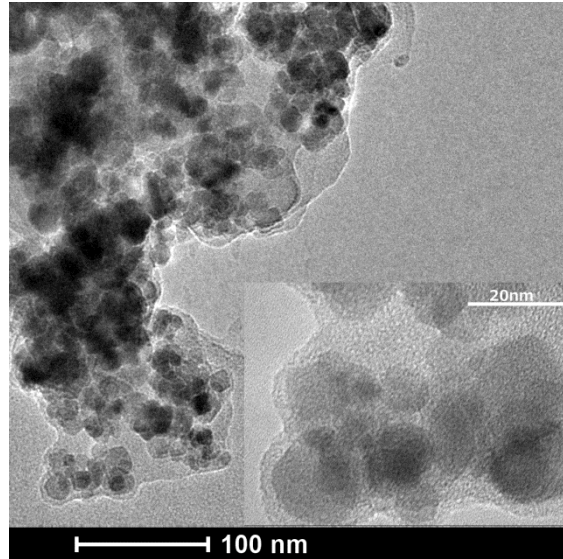

MNP5

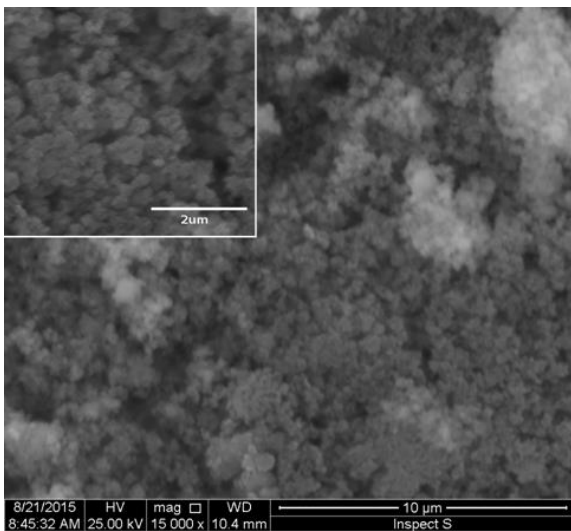

## TGA, DTG and DSC curves

Determination of Tg temperature for polymer:

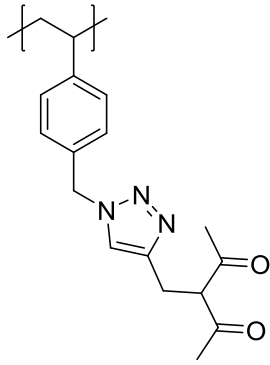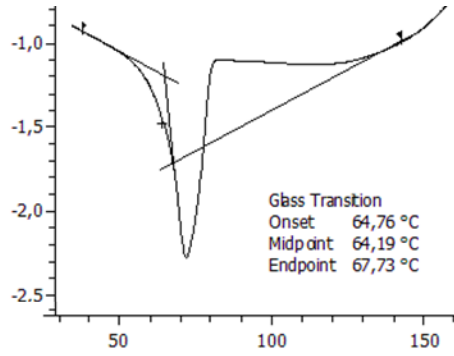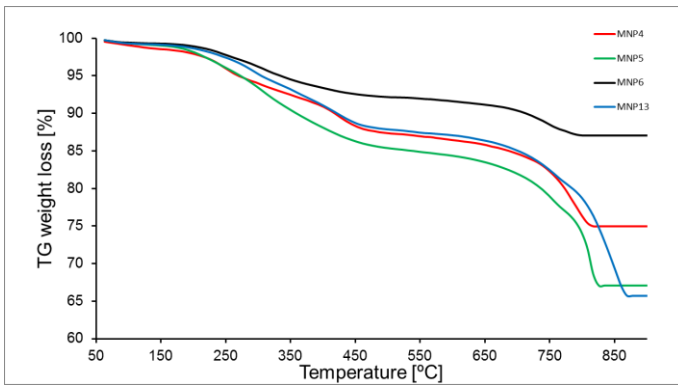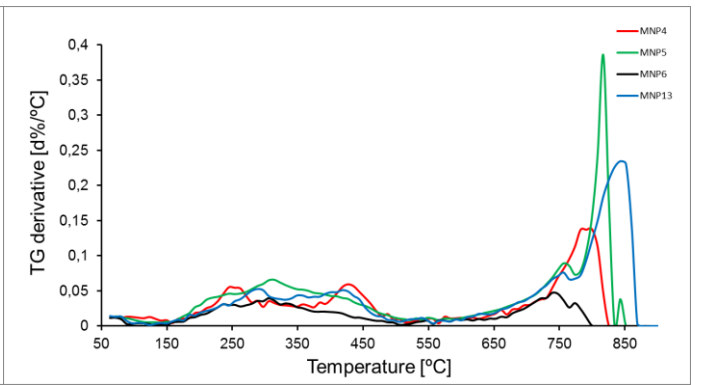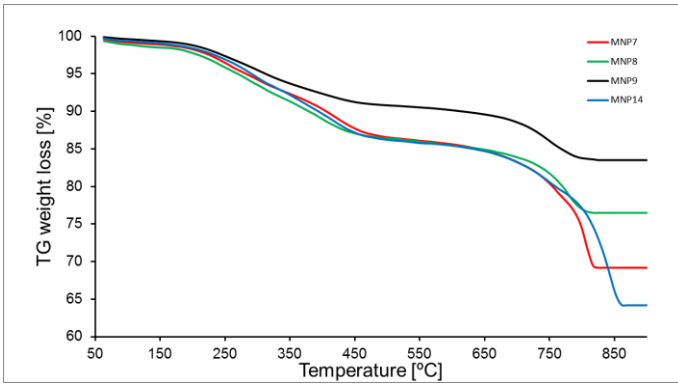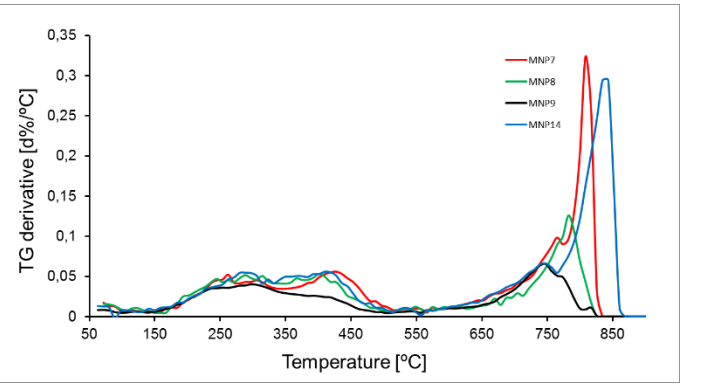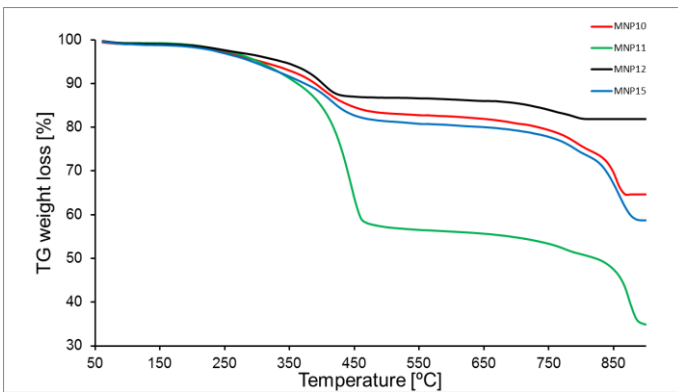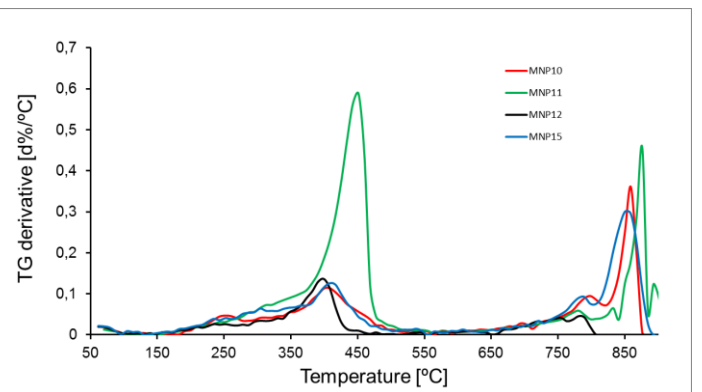

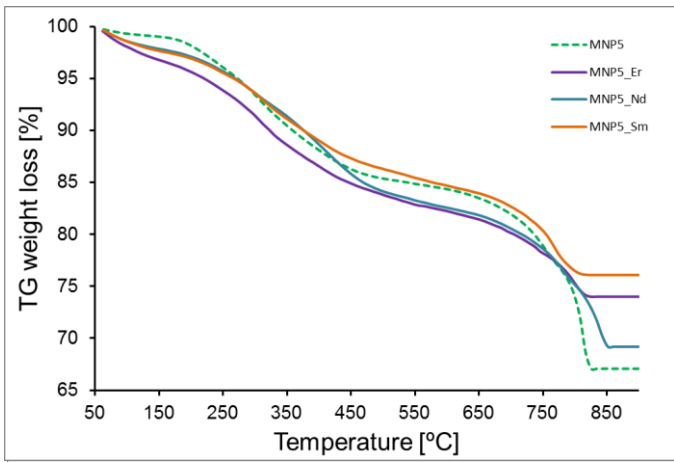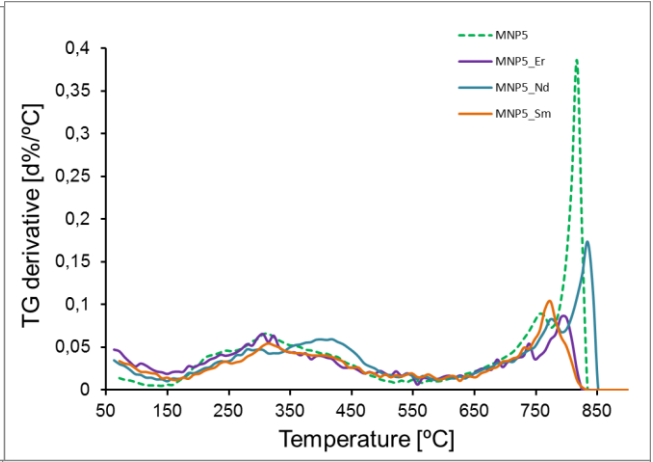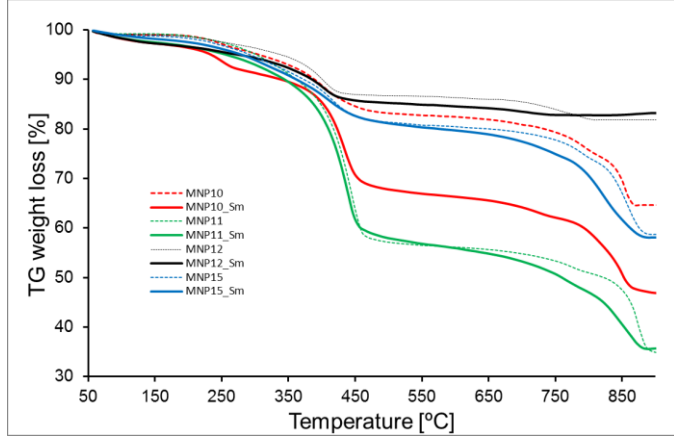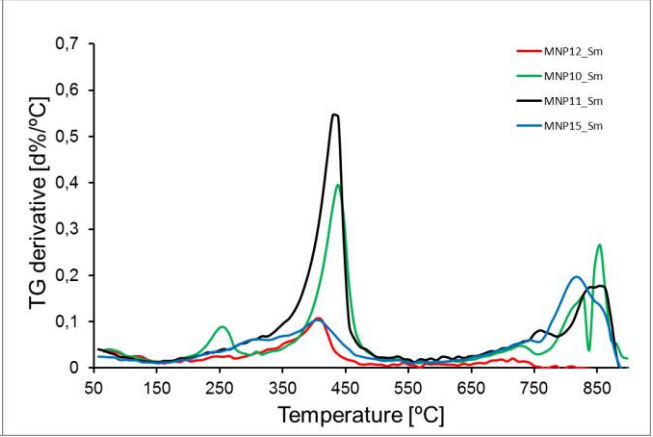

Supplement: c5ra20137c1.pdf [file c5ra20137c1.pdf]
